# Supplementary material for: Insulin Acutely Inhibits Intestinal Lipoprotein Secretion in Humans in Part by Suppressing Plasma Free Fatty Acids
Source: PubMed Central journal article supplement — Diabetes. 2009 Dec 22;59(3):580–7. doi: 10.2337/db09-1297 (PMC2828667; doi:10.2337/db09-1297), 2009-12-22
Supplement: supp_db09-1297_db09-1297_Online_appendix.pdf [file supp_db09-1297_db09-1297_Online_appendix.pdf]

**Online Supplementary Data:**

Table: Kinetic Parameters of individual subjects.

| Apolipoprotein | Subject | FCR (pools/day) |       |        | PR(mg/kg/day) |       |        |
|----------------|---------|-----------------|-------|--------|---------------|-------|--------|
|                |         | INS             | SAL   | INS+IH | INS           | SAL   | INS+IH |
| VLDL1 apoB48   | 1       | 18.39           | 22.39 | 12.10  | 0.13          | 1.17  | 0.79   |
|                | 2       | 3.47            | 8.17  | 7.23   | 0.29          | 0.74  | 0.62   |
|                | 3       | 22.53           | 16.44 | 12.78  | 1.08          | 1.18  | 0.73   |
|                | 4       | 13.13           | 10.61 | 9.49   | 0.53          | 0.99  | 0.95   |
|                | 5       | 41.80           | 7.02  | 7.52   | 0.27          | 0.80  | 0.52   |
|                | 6       | 6.41            | 9.28  | 12.65  | 0.36          | 0.67  | 0.79   |
| VLDL1 apoB100  | 1       | 3.82            | 14.15 | 7.89   | 0.41          | 2.74  | 2.10   |
|                | 2       | 2.04            | 14.02 | 8.42   | 1.22          | 10.72 | 7.09   |
|                | 3       | 14.82           | 12.17 | 14.56  | 5.67          | 7.87  | 4.19   |
|                | 4       | 12.41           | 11.72 | 6.55   | 2.93          | 15.93 | 6.61   |
|                | 5       | 20.37           | 9.48  | 5.57   | 4.25          | 12.44 | 9.74   |
|                | 6       | 17.10           | 8.68  | 5.91   | 5.93          | 4.17  | 6.83   |
| VLDL2 apoB48   | 1       | 11.11           | 17.19 | 12.15  | 0.13          | 1.12  | 0.81   |
|                | 2       | 4.54            | 13.64 | 10.08  | 0.29          | 0.78  | 0.68   |
|                | 3       | 9.88            | 17.34 | 18.68  | 1.10          | 1.08  | 0.79   |
|                | 4       | 17.95           | 10.64 | 10.23  | 0.49          | 0.96  | 0.92   |
|                | 5       | 12.25           | 9.40  | 6.30   | 0.30          | 0.75  | 0.53   |
|                | 6       | 5.52            | 9.11  | 10.50  | 0.35          | 0.66  | 0.76   |
| VLDL2 apoB100  | 1       | 5.96            | 31.29 | 9.17   | 0.86          | 3.66  | 4.79   |
|                | 2       | 7.02            | 26.90 | 13.77  | 2.35          | 11.48 | 7.42   |
|                | 3       | 22.91           | 17.66 | 13.83  | 5.10          | 8.82  | 6.69   |
|                | 4       | 7.31            | 10.57 | 8.51   | 7.97          | 20.59 | 8.25   |
|                | 5       | 30.50           | 17.88 | 7.12   | 12.37         | 15.48 | 13.04  |
|                | 6       | 20.10           | 10.53 | 18.07  | 6.97          | 7.10  | 14.23  |

VLDL, very low density lipoprotein; apo, apolipoprotein; FCR, fractional catabolic rate;

PR, production rate.
